# Supplementary material for: Krypton-85 chronometry of spent nuclear fuel
Source: Copernicus journal article supplement (doi:10.5194/gchron-2024-9), 2024-04-16
Supplement: Supplementary file [file gchron-2024-9-RC1-supplement.pdf]

After having carefully read the paper and checked a few details, I recommend publication but only after some adjustments and improvements.

The more serious points are mentioned below, especially point 5 is relevant as this point is very important for the entire paper.

1. Page 2, line 31: There is the problem with noble gas loss during operation. The authors mention thermally activated diffusion either out of the fuel element or into a bubble. In either way, this process will fractionate the gas. The light isotopes will diffuse faster and will therefore be lost more readily than the heavy isotopes. This process likely needs to be considered but at least should be discussed.
2. Page 5, sample acquisition
  - Both sample are not perfect for determining the age, right? For sample BR3, there was 2 years of irradiation, the one year pause and another year of irradiation. In this one year time gap, some of the  $^{85}\text{Kr}$  decays already. In such a scenario, what exactly are you dating? Is the decay during the gap included. If you know the irradiation conditions, time dependent flux, you can correct for this. I think this should be discussed.
  - Sample ATM-109 is, in my opinion, even worse. With the long irradiation time, you start seeing saturation effects in  $^{85}\text{Kr}$ . How are they included. My understanding was, that this procedure holds for short irradiation times, i.e., when the increase for stable and radioactive isotopes are more or less linear but that saturation effects are not included. For example, in Fig. 2, the ratio  $^{85}\text{Kr} / (^{83}\text{Kr} + ^{84}\text{Kr})$  starts decreasing for long irradiation times. How is this treated?
3. I am not too happy with the blank treatment. From our experience, the blank in a cold environment, i.e., not shooting the laser is typically much lower than the blank in a hot environment, i.e., shooting the laser. This has something to do with production and condensation of hot gas and is actually understandable, heating something up produces gas and some material condenses somewhere and thereby produces blank.
4. In addition, there was no complete noble gas extraction. Usually, this also produces fractionation of the released but also of the remaining gas. Has this been tested? Are the noble gas isotope ratios released in the individual steps consistent? This needs a little more work.
5. Page 11: There is some point I cannot understand. First, how can gas loss affect the age? Assuming production is still in the linear range, i.e., short irradiation time, loss of noble gases would affect all isotopes simultaneously and would therefore have no effect on the age, right? This is true for any type of gas losses (location) but in my opinion also true for the time when the gas loss occurred (early or late in the irradiation). The same is true with a change in production rates. If the change is the same of all isotopes, you won't see it in your procedure. For a long irradiation, when the increase of  $^{85}\text{Kr}$  is lower than linear due to saturation effects.

One still loses the same amount of  $^{83}\text{Kr}$ ,  $^{84}\text{Kr}$ , and  $^{85}\text{Kr}$  in that hypothetical loss event but now one loses relatively more  $^{83}\text{Kr}$  and  $^{84}\text{Kr}$  relative to  $^{85}\text{Kr}$

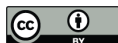

# Krypton-85 chronometry of spent nuclear fuel

Greg Balco<sup>1</sup>, Andrew J. Conant<sup>2</sup>, Dallas D. Reilly<sup>3</sup>, Dallin Barton<sup>3</sup>, Chelsea D. Willett<sup>1</sup>, and Brett H. Isselhardt<sup>1</sup>

<sup>1</sup>Lawrence Livermore National Laboratory, 7000 East Ave, Livermore CA USA

<sup>2</sup>Oak Ridge National Laboratory, Oak Ridge TN USA

<sup>3</sup>Pacific Northwest National Laboratory, Richland WA USA

**Correspondence:** Greg Balco (balco1@llnl.gov)

**Abstract.** We describe the use of the radionuclide <sup>85</sup>Kr, which is produced by nuclear fission and has a half-life of 10.74 years, to determine the age of spent nuclear fuel.

## 1 Introduction

In this paper we describe the use of the radionuclide krypton-85, which is produced by uranium and plutonium fission and has a half-life of 10.74 years, as a means of determining the age of spent nuclear fuel. The noble gases Kr and Xe are produced in large quantities by nuclear fission, and because of their chemically inert nature after production have been proposed as a tool for international monitoring of nuclear materials production. For example, isotope ratios of Xe and Kr released when reprocessing nuclear fuel have been used for verifying that fuel history, usage, and plutonium production are consistent with declared nuclear activities (Hudson, 1993; Okano et al., 2006). More broadly, isotope ratio signatures of nuclear fuel and other materials can also be used for forensic purposes to identify and/or attribute nuclear materials of unknown origin (Kristo et al., 2016). Radiochronometry of nuclear fuel is valuable for forensic applications because it can be used to identify or exclude potential facilities of origin, and in addition is potentially a position-independent signature (e.g., Robel et al., 2018) that can be used to group samples that may have originated from different locations in the same fuel element or assembly. By grouping samples that were irradiated together, variations in irradiation conditions and history inferred from an array of coeval samples can be used to reconstruct reactor type and operating conditions (Dayman and Weber, 2018; Dayman et al., 2019; Savina et al., 2023). The ability to group samples into collections of common origin is particularly important when working with fragments or particles, as might be available in forensic investigations, rather than bulk quantities of fuel applicable in routine monitoring of reprocessing facilities.

Because its half-life is appropriate for events postdating the worldwide development of nuclear power in the 1950's, <sup>85</sup>Kr has been proposed as a useful chronometer for nuclear fuel (Okano et al., 2006; Park et al., 2010). It has several potential advantages for this purpose, including the relative simplicity of noble gas measurements, the routine availability of noble gas mass spectrometry systems, and the potential feasibility of nondestructive analysis of solid samples. Here we (i) describe the theoretical basis of computing a <sup>85</sup>Kr age from measurements of Kr (and Xe) isotope ratios; (ii) apply

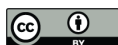

the method to bulk and particulate samples from two example spent fuel rods; and (iii) discuss the relative merits of  $^{85}\text{Kr}$  and other isotope ratio chronometers as dating methods and as position-independent means of grouping samples.

## 2 Theoretical basis of $^{85}\text{Kr}$ chronometry

The noble gases Kr and Xe are produced in significant quantities by fission of U and Pu, comprising about 15% of all fission products. Besides the radioisotope  $^{85}\text{Kr}$ , these include three stable isotopes of Kr (83,84,86), four stable isotopes of Xe (131,132,134,136), and two short-lived Xe radioisotopes (133,135). Fissionogenic Kr and Xe isotope ratios are variable among different fissioning nuclides ( $^{235}\text{U}$ ,  $^{238}\text{U}$ ,  $^{239}\text{Pu}$ ) and to a lesser extent with the energy spectrum of neutrons inducing fission (Table 1; Figure 1). Being inert noble gases, Kr and Xe are somewhat mobile within fuel by thermally activated diffusion, and during fuel irradiation are known to both migrate from the fuel matrix into bubbles at grain boundaries and, to some extent, to diffuse entirely out of fuel pellets. Commonly, 10-15% of total Kr and Xe produced during fuel irradiation is found to have diffused out of fuel pellets into the plenum of spent fuel rods (Rest et al., 2019). Noble gas mobility, therefore, precludes computing a  $^{85}\text{Kr}$  age simply by measuring the ratio of  $^{85}\text{Kr}$  to its relatively immobile decay product  $^{85}\text{Rb}$ . Instead, it is necessary to measure the ratio of  $^{85}\text{Kr}$  to one or more stable isotopes of Kr that are simultaneously produced and transported. Comparison of the measured isotope ratio to the initial ratio at the time of fission production provides an age.

There are two challenges in formulating a ratio of  $^{85}\text{Kr}$  to other Kr isotopes for use in chronometry. First, after fission production, the abundance of some stable isotopes of Kr change due to neutron capture; in particular, conversion of  $^{83}\text{Kr}$  to  $^{84}\text{Kr}$  by neutron capture has a relatively high cross-section (Table 1), so the  $^{84}\text{Kr}/^{83}\text{Kr}$  ratio varies significantly with both neutron flux and the duration of fuel irradiation. We therefore address this by utilizing the ratio  $^{85}\text{Kr}/(^{83}\text{Kr}+^{84}\text{Kr})$ , which is insensitive to neutron capture after production. Potentially, the ratios  $^{85}\text{Kr}/^{86}\text{Kr}$  or  $^{85}\text{Kr}/(^{83}\text{Kr}+^{84}\text{Kr}+^{86}\text{Kr})$  could also be used in a similar way (Table 1), but for simplicity we discuss only  $^{85}\text{Kr}/(^{83}\text{Kr}+^{84}\text{Kr})$ .

Second, the initial  $^{85}\text{Kr}/(^{83}\text{Kr}+^{84}\text{Kr})$  ratio at the time of Kr production by fission, as noted above, varies among different fission sources. The fuel in typical nuclear reactors is low-enriched uranium oxide ( $\text{UO}_2$ ) with 5% or less  $^{235}\text{U}$  enrichment. When irradiation of fresh fuel begins, production is dominated by  $^{235}\text{U}$  fission. As irradiation proceeds and  $^{235}\text{U}$  is consumed, fission of  $^{239}\text{Pu}$  produced by neutron capture on  $^{238}\text{U}$  accounts for an increasing proportion of fission production of Kr. At high levels of fuel burnup,  $^{235}\text{U}$  is exhausted and Kr production is dominated by  $^{239}\text{Pu}$  fission, with a small contribution from fast neutron-induced fission of  $^{238}\text{U}$ . Thus, as irradiation proceeds, the initial  $^{85}\text{Kr}/(^{83}\text{Kr}+^{84}\text{Kr})$  value of newly produced Kr evolves from a value characteristic of  $^{235}\text{U}$  fission to a  $\sim 15\%$  lower value characteristic of  $^{239}\text{Pu}$  fission. However, it is possible to estimate the initial  $^{85}\text{Kr}/(^{83}\text{Kr}+^{84}\text{Kr})$  ratio applicable to Kr extracted from fuel by reference to another Kr isotope ratio, specifically  $^{86}\text{Kr}/(^{83}\text{Kr}+^{84}\text{Kr})$ , which is also diagnostic of the fission source, also insensitive to neutron capture after production, and includes only stable isotopes so is not modified by radioactive decay after irradiation (Cassata et al., 2023, ; Figs 1,2). This strategy is important because it allows a  $^{85}\text{Kr}$  age to be computed from a single measurement of the Kr isotope composition of a gas sample: even though the initial  $^{85}\text{Kr}/(^{83}\text{Kr}+^{84}\text{Kr})$  ratio varies with the

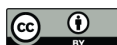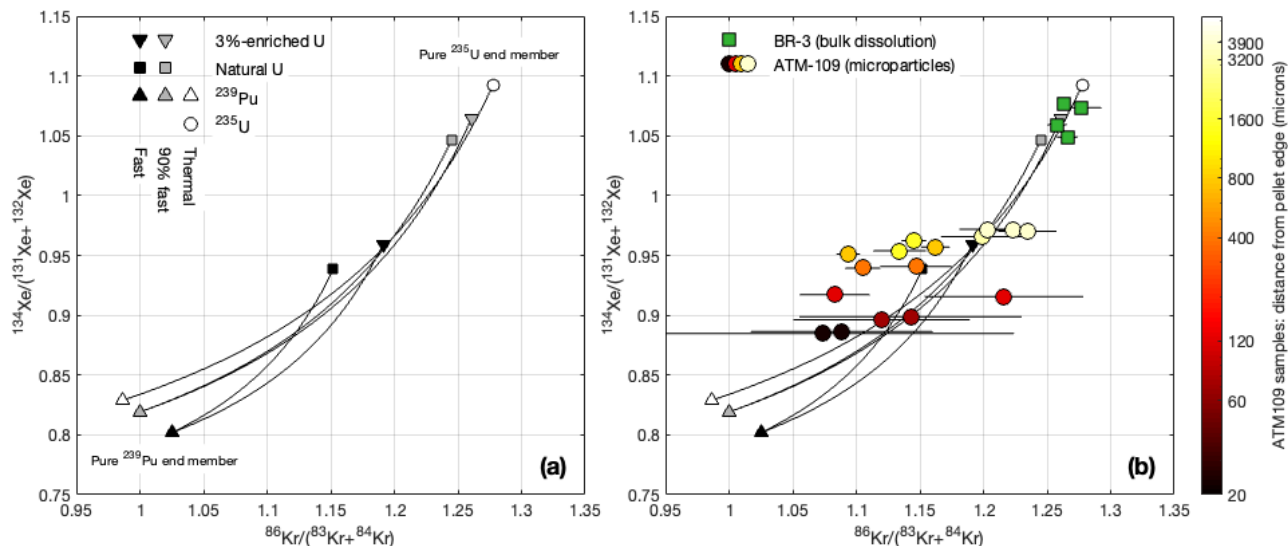

**Figure 1.** Variation in stable isotope ratios of fissionogenic Kr and Xe with fission source. The ratios  $^{86}\text{Kr}/(^{83}\text{Kr} + ^{84}\text{Kr})$  and  $^{134}\text{Xe}/(^{131}\text{Xe} + ^{132}\text{Xe})$  are minimally influenced by neutron capture reactions after production and are therefore diagnostic of the fission reactions from which the gas was sourced. Panel (a) shows the expected isotope ratios calculated from cumulative fission yields for end-member fuel compositions and neutron spectra, as well as mixing lines between the end member compositions (see Cassata et al., 2023, for additional details on this diagram). The mixing lines are curved because fission yields are higher for Xe than for Kr. In other words, they represent mixtures of sources rather than mixtures of products: gas compositions produced over a long period of time from an evolving fuel composition could lie anywhere in the region spanned by the curves. Overall, possible fission gas compositions form an array between  $^{235}\text{U}$  and  $^{239}\text{Pu}$  end members, with secondary variability associated with neutron spectrum and contributions from fast neutron fission of  $^{238}\text{U}$ . Panel (b) shows the same predicted array with measured Xe and Kr isotope compositions in the samples analyzed in this study, which span a range of fission source from nearly pure  $^{235}\text{U}$  (for the 8%-enriched, low-burnup BR3 fuel) to a significant fraction of  $^{239}\text{Pu}$  (for the lower-enriched, high-burnup ATM-109 fuel). The results for the BR3 sample are from Cassata et al. (2023).

relative contribution of different fissionable nuclides, it is possible to estimate it without independent knowledge of U and Pu isotope concentrations by exploiting its correlation with a stable isotope ratio that is diagnostic of the fission source.

Thus, our overall procedure for computing a  $^{85}\text{Kr}$  age is to (i) use the observed  $^{86}\text{Kr}/(^{83}\text{Kr} + ^{84}\text{Kr})$  to estimate the composition of fissioning actinides responsible for Kr production and therefore the initial  $^{85}\text{Kr}/(^{83}\text{Kr} + ^{84}\text{Kr})$  ratio, and (ii) compare measured and initial  $^{85}\text{Kr}/(^{83}\text{Kr} + ^{84}\text{Kr})$  to obtain an apparent gas age. Alternatively, Xe and Kr isotopes are commonly measured simultaneously, so the initial  $^{85}\text{Kr}/(^{83}\text{Kr} + ^{84}\text{Kr})$  ratio can also be estimated from an equivalent source-sensitive, non-neutron-capture-sensitive ratio of stable Xe isotopes, specifically  $^{134}\text{Xe}/(^{131}\text{Xe} + ^{132}\text{Xe})$  (Cassata et al., 2023, Figs. 1, 2). This is potentially advantageous because Xe is produced by fission in much greater abundance than Kr, so Xe isotope ratios are often measured more precisely.

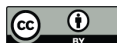

Although it is evident from Figure 2 that knowing either the  $^{86}\text{Kr}/(^{83}\text{Kr}+^{84}\text{Kr})$  or  $^{134}\text{Xe}/(^{131}\text{Xe}+^{132}\text{Xe})$  ratio provides a fairly close estimate of the initial  $^{85}\text{Kr}/(^{83}\text{Kr}+^{84}\text{Kr})$ , there is some variability associated with the neutron spectrum responsible for inducing fission. However, this variability is small for typical power reactors, which are fairly well approximated by the fission yields for the 10%-thermal-90%-fast spectrum shown in Figs 1 and 2. Thus, we use this scenario henceforth to estimate initial  $^{85}\text{Kr}/(^{83}\text{Kr}+^{84}\text{Kr})$  ratios. Note that this would not be appropriate for unusual reactor types having an unmoderated fast neutron spectrum; initial  $^{85}\text{Kr}/(^{83}\text{Kr}+^{84}\text{Kr})$  ratios from entirely fast-neutron-induced fission would be lower (Fig. 2). However, an unusual reactor type could easily be identified from other Xe and Kr isotope signatures.

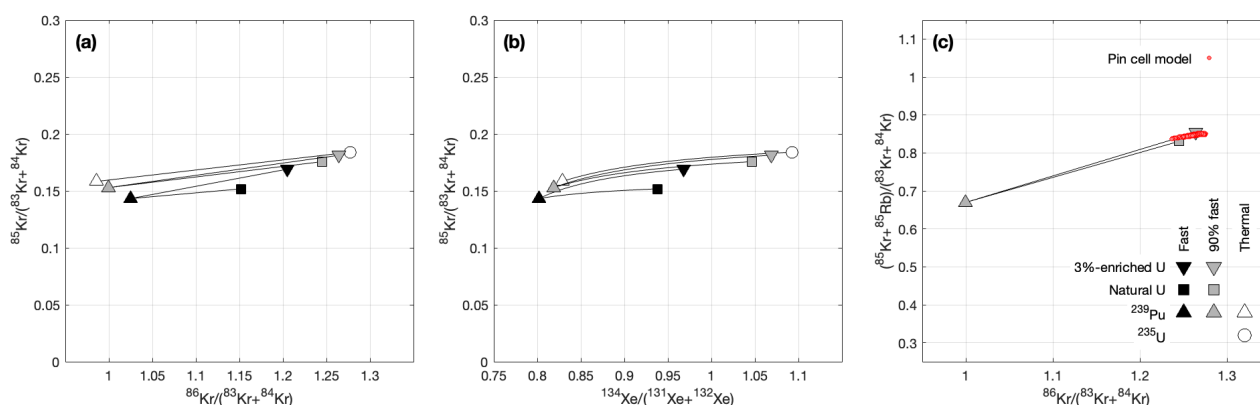

**Figure 2.** Panels (a) and (b) show the variation in the initial  $^{85}\text{Kr}/(^{83}\text{Kr}+^{84}\text{Kr})$  ratio at production across a range of fission sources. As in Figure 1, these are calculated for cumulative fission yields for end member fuel compositions and neutron spectra; the symbols are the same in both figures. This ratio is correlated with the stable isotope ratios  $^{86}\text{Kr}/(^{83}\text{Kr}+^{84}\text{Kr})$  and  $^{134}\text{Xe}/(^{131}\text{Xe}+^{132}\text{Xe})$ , so even without independent knowledge of the fuel composition, it is possible to estimate the initial  $^{85}\text{Kr}/(^{83}\text{Kr}+^{84}\text{Kr})$  ratio from a measurement of one (or both) of the stable isotope ratios. Panel (c) compares the isotope ratio correlation predicted from the fission yields with the result of a reactor model simulation intended to simulate the irradiation of the BR3 fuel that includes all neutron capture reactions. We use the sum of  $^{85}\text{Kr}$  and its decay product  $^{85}\text{Rb}$  to allow model-data comparison without correcting for  $^{85}\text{Kr}$  decay (see text for detailed discussion). The model results are within 1% of the prediction from the fission yields for enriched uranium with a typical neutron spectrum, showing that neutron fluence effects on the initial ratio are negligible. Note that pure fast and thermal neutron production curves are not shown in the right panel.

A final point is that, although  $^{85}\text{Kr}/(^{83}\text{Kr}+^{84}\text{Kr})$  is relatively insensitive to fluence because the summation of  $^{83}\text{Kr}$  and  $^{84}\text{Kr}$  in the denominator removes fluence dependence related to the dominant neutron capture reaction on  $^{83}\text{Kr}$ , the other Kr isotopes have neutron capture cross-sections that are nonzero (although two orders of magnitude less than  $^{83}\text{Kr}$ ; see Table 1), so there is likewise the possibility of a nonzero fluence dependence for  $^{85}\text{Kr}/(^{83}\text{Kr}+^{84}\text{Kr})$ . We investigated this using the results of the pin cell model for a pressurized water reactor described in Cassata et al. (2023), which tracks all fission, neutron capture, and decay reactions and therefore should expose any deviation in the initial  $^{85}\text{Kr}/(^{83}\text{Kr}+^{84}\text{Kr})$  ratio from the expected fission yield ratios due to neutron interactions. We show the results of this comparison in Figure 2 (right panel), although we include  $^{85}\text{Rb}$ , the decay product of  $^{85}\text{Kr}$ , in the numerator as well so that decay of  $^{85}\text{Kr}$



during the model simulation does not obscure any fluence effects. The cross-section for neutron capture on  $^{85}\text{Rb}$  is greater than that for  $^{85}\text{Kr}$ , so this comparison likely yields an upper limit on the effect of fluence on the  $^{85}\text{Kr}/(^{83}\text{Kr}+^{84}\text{Kr})$  ratio. Regardless, deviations between the model simulation and a simple calculation of the expected initial ratio from the fission yields are less than 1% for the entire model simulation. In practice, the uncertainty in estimating  $^{85}\text{Kr}/(^{83}\text{Kr}+^{84}\text{Kr})$  from  $^{86}\text{Kr}/(^{83}\text{Kr}+^{84}\text{Kr})$  or  $^{134}\text{Xe}/(^{131}\text{Xe}+^{132}\text{Xe})$  will therefore most likely be dominated by measurement uncertainty on the isotope ratios, with uncertainty in the assumed neutron spectrum providing a minor contribution. In the presumably very unusual case where the reactor type from which a sample originated is completely unknown, uncertainty in the neutron energy spectrum could yield an additional  $\sim 4\text{-}5\%$  uncertainty in the initial  $^{85}\text{Kr}/(^{83}\text{Kr}+^{84}\text{Kr})$  ratio estimated from one of the stable isotope ratios.

### 90 3 Sample acquisition and analysis

We describe noble gas measurements on portions of fuel rods from two reactors. Typical commercial power reactor fuel consists of cylindrical  $\text{UO}_2$  pellets with diameter  $\sim 1$  cm that are stacked and encapsulated in airtight metallic cladding to form 0.5-4 meter-long rods. The neutron spectrum and flux within a reactor are spatially variable, so different portions of a fuel rod will evolve differently and therefore have somewhat different fission gas isotope compositions. As discussed in the introduction, we are interested in establishing whether the  $^{85}\text{Kr}$  age of a fuel element is or is not position-independent, so the purpose of sample selection was to capture both axial and radial variability within fuel rods. In addition, the sample set includes both bulk analysis of complete slices of a fuel rod and analysis of individual microparticles excised from bulk fuel.

The first set of samples are slices taken at different axial positions along a fuel rod from Belgian Reactor No. 3 (henceforth, 'BR3'), a pressurized water reactor in Mol, Belgium. This rod had an initial  $^{235}\text{U}$  enrichment of 8.26% and underwent two periods of irradiation, between July 1976-April 1978 and June 1979-September 1980. This fuel sample has been characterized in detail for a variety of research purposes (e.g., Hanson and Pollington, 2021; Savina et al., 2021, 2023). Four slices from different axial positions spanning the 1-meter length of the rod were completely dissolved in a sealed system, and the gas released during dissolution was collected for noble gas separation and analysis. Analytical methods for these samples as well as stable Xe and Kr isotope compositions are described in detail in Cassata et al. (2023) and summarized in Table 2. Average burnup inferred from dissolution and actinide analysis of these samples was also reported by Cassata et al. and ranged from 19-48 GWd/ton. Most aspects of the fission gas isotope composition of these samples were discussed in the Cassata reference; here we add discussion of the  $^{85}\text{Kr}$  results.

The second set of samples are microparticles isolated from a slice of a fuel rod that was irradiated in the Quad Cities Unit 1 reactor, a boiling water reactor located in Cordova, IL, USA. This fuel rod had an initial  $^{235}\text{U}$  enrichment of 3%, included 2 wt. %  $\text{Gd}_2\text{O}_3$ , and was irradiated between February 1979-September 1987 and then again from November 1989-September 1992. This irradiation is substantially longer than typical in commercial reactor operations. Portions of this fuel were subsequently made available for study as 'Approved Testing Material 109' (henceforth, 'ATM-109'), which





has also been characterized for various research purposes (e.g., Wolf et al., 2005; Buck et al., 2015; Pellegrini et al.,  
115 2019; Clark et al., 2020). Analyses of various subsamples of this material indicated radially averaged burnup in the range  
61-78 GWd/ton (Wolf et al., 2005). We obtained a cross-sectional slice of the ATM-109 material from near the axial center  
of the fuel rod and further sectioned it into a matchstick-shaped segment (Figure 3). A focused ion beam (FIB) system  
was used to cut and separate roughly cube-shaped samples of fuel 1-4 microns in size ("cubes"; see Figs. 3,4) from  
various radial positions, which were then attached to molybdenum carrier plates for further handling. More information on  
120 this sampling procedure is provided in Reilly et al. (2020). We cut and analyzed multiple replicate cubes at each radial  
position.

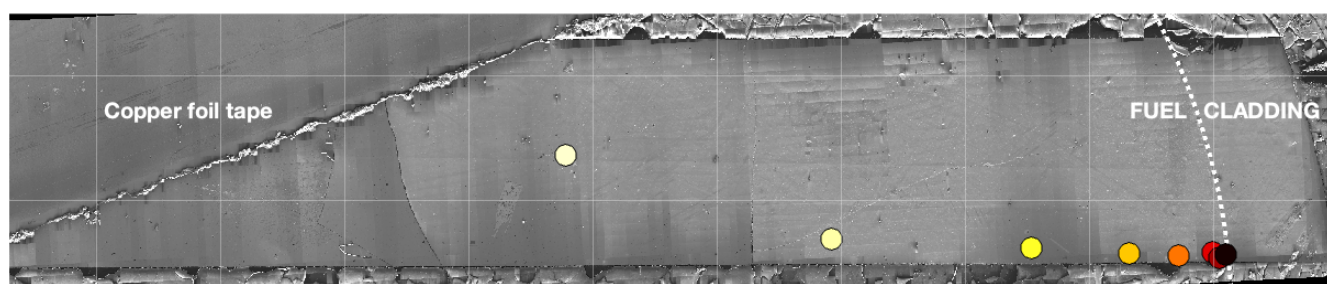

**Figure 3.** Scanning electron microscope image mosaic of slice of ATM-109 fuel pellet sampled for this work. The image shows a matchstick-shaped segment of a disc cut from the middle of a fuel rod, including both fuel and cladding. The surrounding material with a cracked texture visible at the edges of the image is epoxy used for mounting the sample, and part of the sample at upper left has been covered by copper tape. Colored dots show the locations from which samples were removed using a focused ion beam; 2-3 replicate cubes were cut from each location. The same colors are used to indicate radial position in subsequent figures. Light-colored grid lines have 1-millimeter spacing. The diameter of the fuel pellet is 1.06 cm.

Xe and Kr were extracted from FIB "cubes" by heating under vacuum. We placed each molybdenum carrier inside a flattened segment ("packet") of Ta tubing that had previously been annealed under vacuum to remove any included atmospheric or process gases. The packets were placed under vacuum and heated with a 150 W, 970 nm diode laser.  
125 The laser system is equipped with a coaxial optical pyrometer that permits measurement of the packet temperature during heating, and for a subset of the samples we calibrated the pyrometer to the emissivity of the packets, yielding accurate measurements of true temperatures during heating. After initial experiments on some samples to determine the approximate temperature necessary to release noble gases from the fuel matrix, for most samples we applied a heating schedule consisting of a 90-second preheating step at 600° C to desorb any contaminant Xe and/or Kr derived from  
130 the atmosphere, followed by a series of higher-temperature heating steps starting at 1000°-1200° C and increasing in temperature until the amount of Xe released in each step began to decrease significantly. We did not continue to increase the temperature to the point where zero gas was observed in the final step for all samples (because one of our objectives was to determine whether or not the samples could be recovered for additional analyses, we did not heat to temperatures higher than necessary), so we can not verify complete gas extraction for all samples. However, we observed near-zero





135 gas release in the final step for many samples, and we estimate from the degassing pattern that >95% of fission gas present was most likely released from all samples. The highest temperature we achieved for any sample was 1440° C, which is well below the melting temperature of uranium oxide. Microscopic examination of some samples after heating showed that they were intact and could potentially be used for further chemical analysis.

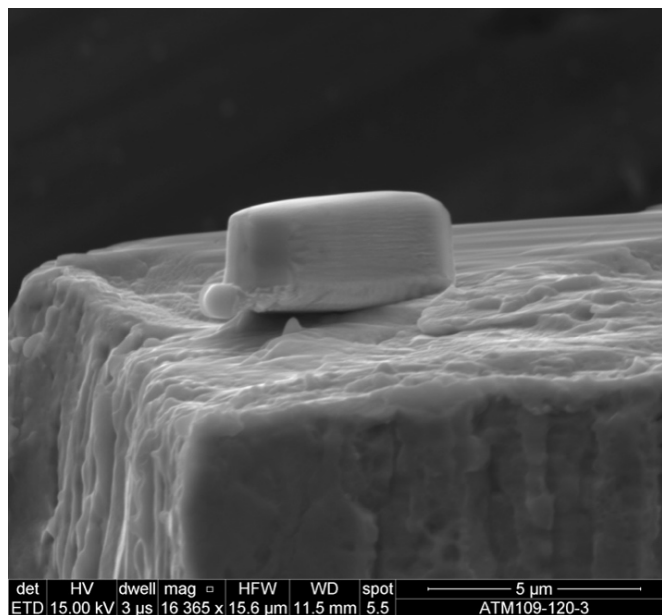

**Figure 4.** Scanning electron microscope image of a sample of ATM-109 fuel prepared for noble gas analysis. The sample is a 4-micron-long rectangular solid ("cube") cut from the fuel using a focused ion beam (FIB) system. It is mounted to a molybdenum substrate for handling.

Gas extracted by heating was then exposed to hot and cold getters to remove any reactive gases, and Xe and Kr were separated from other noble gases by exposure to a helium-cooled stainless steel cold trap held at 60° K. The trap was then warmed to 220° K and Kr and Xe were let into a Nu Noblesse multicollector noble gas mass spectrometer. All stable isotopes of Xe and Kr, plus <sup>85</sup>Kr, were measured. Detector intercalibration and correction for mass discrimination were accomplished by analysis of an atmospheric Xe-Kr standard that was measured at least twice daily. Background corrections to sample and standard analyses were based on full system blanks, measured in the same way as the samples except that the packets were not heated. After background correction, further corrections for any atmospheric Xe and/or Kr present were made by assuming that all <sup>129</sup>Xe and <sup>80</sup>Kr observed were atmospheric, and correcting other isotopes accordingly. Thus, data presented in Table 2 are isotope ratios for fissionogenic Xe and Kr after atmospheric correction. Finally, total amounts of all isotopes released in heating steps after the initial preheat step were summed to calculate summary isotope ratios for gas released from each sample. These results are shown in Table 2 and the complete step-degassing data are in the supplement.



#### 4 Results and discussion

Figure 1 shows stable Kr and Xe isotope signatures that are diagnostic of fission source. As discussed in Cassata et al. (2023), Kr-Xe data for the BR3 bulk samples indicate that fission gas production is dominated by  $^{235}\text{U}$  fission, as expected for a moderately-enriched fuel that experienced only moderate burnup. Stable isotope ratios for the ATM-109 fuel, on the other hand, indicate a much larger contribution from  $^{239}\text{Pu}$  fission, as expected for a lower-enriched fuel at high burnup that is likely nearly entirely depleted in  $^{235}\text{U}$ . In addition, the ATM-109 data display a strong edge effect such that samples from closer to the edge have a fission gas composition closer to the  $^{239}\text{Pu}$  end member. Again, this is expected from the fact that neutron capture on  $^{238}\text{U}$  and therefore  $^{239}\text{Pu}$  production is highest at the edge of fuel pellets. Overall, the important observation from these data is that the particulate samples span a much larger range of fission sources and therefore fission gas compositions than the bulk fuel samples.

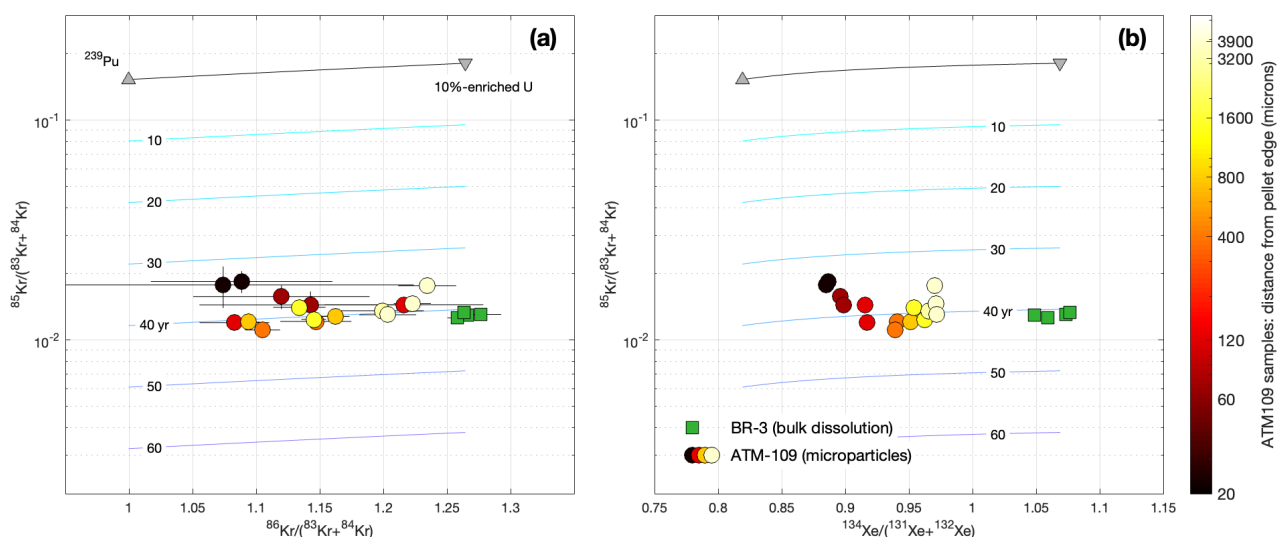

**Figure 5.** Graphical representation of the apparent  $^{85}\text{Kr}$  age of spent fuel samples. The gray line at the top is the initial  $^{85}\text{Kr}/(^{83}\text{Kr}+^{84}\text{Kr})$  ratio at production for a range of fission sources and a 90%-fast-10%-thermal neutron spectrum, as shown in Figure 2. As discussed above, the initial ratio is weakly variable among fission source but can be inferred from its correlation with the stable isotope ratios  $^{86}\text{Kr}/(^{83}\text{Kr}+^{84}\text{Kr})$  (panel a) or  $^{134}\text{Xe}/(^{131}\text{Xe}+^{132}\text{Xe})$  (panel b). Decay of  $^{85}\text{Kr}$  after production then causes the  $^{85}\text{Kr}/(^{83}\text{Kr}+^{84}\text{Kr})$  ratio to decrease over time, as indicated by the colored isochrons labeled in years. This allows an apparent age of the fission gas to be calculated. Error bars on data are  $1\sigma$  and, where not visible, are smaller than the size of the plotting symbols. Comparison of these plots shows that, for the particulate samples from ATM-109, relatively large uncertainties in the  $^{86}\text{Kr}/(^{83}\text{Kr}+^{84}\text{Kr})$  ratio measured on small amounts of gas mean that the initial  $^{85}\text{Kr}/(^{83}\text{Kr}+^{84}\text{Kr})$  can be estimated more accurately from the Xe data. Note that the  $^{85}\text{Kr}/(^{83}\text{Kr}+^{84}\text{Kr})$  ratios are plotted as measured at the time of analysis and have not been normalized to the same analysis date.



Figure 5 shows the relationship of the  $^{85}\text{Kr}$  data to the stable Kr and Xe isotope ratios indicative of fission source. Across the full range of stable isotope compositions, the differences between measured  $^{85}\text{Kr}/(^{83}\text{Kr}+^{84}\text{Kr})$  ratios and production ratios expected from fission yields are consistent with 34-41 years of decay following irradiation. Apparent ages of the BR3 fuel show minimal axial variation among samples. As observed in the stable isotope ratios, apparent ages of the ATM-109 particle samples show significant radial variability, with samples near the edge having younger apparent ages. It is evident from both Figures 1 and 5 that for the ATM-109 particle samples, Kr isotope ratios have significantly larger uncertainties and scatter than Xe isotope ratios; this is primarily due to low abundance of Kr. For mass-spectrometric measurement of these samples, signals for Kr isotopes on ion counters were in the range 10-100 cps, whereas Xe isotope signals were an order of magnitude higher. For the bulk dissolution samples, a large quantity of gas was available and Kr measurement precision was not signal-limited.

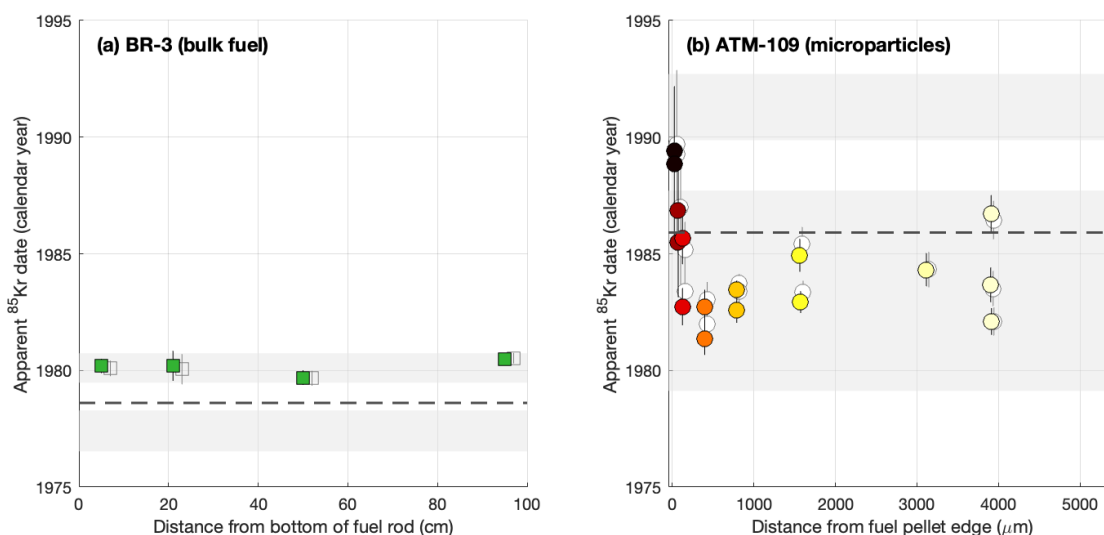

**Figure 6.** Apparent  $^{85}\text{Kr}$  dates for bulk fuel samples from BR3 (a) and microparticle samples from ATM-109 (b). The prominent colored symbols are the dates calculated using the  $^{134}\text{Xe}/(^{131}\text{Xe}+^{132}\text{Xe})$  ratio to estimate the initial  $^{85}\text{Kr}/(^{83}\text{Kr}+^{84}\text{Kr})$  ratio, and the lighter unshaded symbols behind them are calculated using the  $^{86}\text{Kr}/(^{83}\text{Kr}+^{84}\text{Kr})$  ratio as the estimator. The two approaches yield indistinguishable results. The shaded regions are the periods of time during which the respective fuels were irradiated, and the dashed lines are the apparent  $^{85}\text{Kr}$  dates expected given simple assumptions that  $^{85}\text{Kr}$  production is constant throughout the irradiation and all gas is retained. The color-coding of the symbols is the same as in previous figures.

Table 3 shows apparent  $^{85}\text{Kr}$  ages calculated from Kr and Xe isotope ratios, and Figure 6 compares them with the known irradiation dates of the two fuels. Apparent  $^{85}\text{Kr}$  ages in this figure and in Table 3 have been calculated as described above, in which we assume that initial  $^{85}\text{Kr}/(^{83}\text{Kr}+^{84}\text{Kr})$  ratios at production lie on the mixing curve between 10%-enriched U and  $^{239}\text{Pu}$  for a 90%-fast-10%-thermal neutron spectrum as shown in Figs. 2 and 5, and use this mixing curve with the



175 measured  $^{86}\text{Kr}/(^{83}\text{Kr}+^{84}\text{Kr})$  or  $^{134}\text{Xe}/(^{131}\text{Xe}+^{132}\text{Xe})$  ratios to estimate the initial ratio applicable to each sample. We now discuss several aspects of these results.

First, we discuss internal variation in apparent  $^{85}\text{Kr}$  dates for both fuels. Dates for the BR3 bulk fuel samples are indistinguishable across a range of axial positions. On the other hand,  $^{85}\text{Kr}$  dates on the ATM-109 particle samples show both (i) variance in excess of measurement uncertainty among replicate samples taken from the same radial position, 180 and (ii) an edge effect in which  $^{85}\text{Kr}$  dates from samples within  $\sim 100\ \mu\text{m}$  of the fuel pellet edge are significantly younger than those from the pellet center. We hypothesize that the scatter among replicates is likely due to partitioning of fission gas between fuel matrix and bubbles due to gas mobility during irradiation. Xe and Kr are known to migrate into micron- or sub-micron-scale bubbles during fuel irradiation (see, e.g., Rest et al., 2019) and therefore, on average, gas in bubbles must have an older production age than gas in the matrix. This would imply micron-scale inhomogeneity in gas age, 185 which appears to have been captured by our sampling procedure. The edge effect is nearly certainly due to gas loss associated with so-called "high-burnup structure" (e.g., Rondinella and Wiss, 2010) at fuel pellet edges. High-burnup structure forms by recrystallization of fuel subjected to high local concentrations of fissions, primarily at the outer surface of fuel pellets. Various microbeam studies of spent fuel (Walker et al., 2012) have observed lower concentrations of fission gases within regions of high-burnup structure, implying that recrystallization of the fuel matrix either directly rejects noble 190 gases or temporarily or permanently enhances their diffusivity. Regardless of the process, these observations imply that gas produced early in the irradiation has been lost in regions of high-burnup structure, and gas that is still present was produced late in the irradiation. This is exactly what we observe in the  $^{85}\text{Kr}$  data.

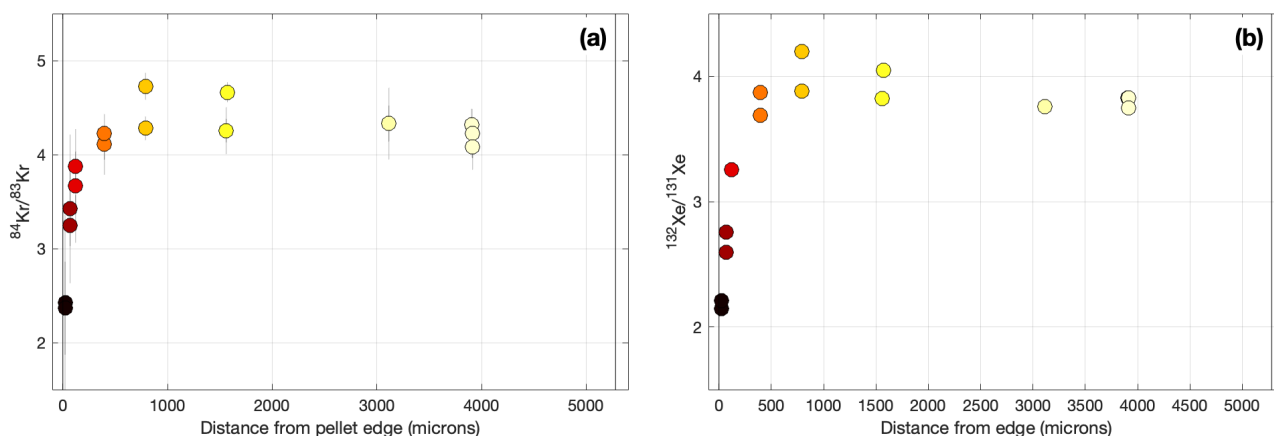

**Figure 7.** Radial variation in fluence-sensitive  $^{84}\text{Kr}/^{83}\text{Kr}$  (a) and  $^{132}\text{Xe}/^{131}\text{Xe}$  (b) ratios in ATM-109 fuel. Color-coding of symbols is the same as in previous figures.

The hypothesis that the edge effect in apparent  $^{85}\text{Kr}$  ages in the ATM-109 fuel is due to gas loss due to formation of high-burnup structure is consistent with other stable isotope evidence. Figure 7 shows radial variation in the ratios



195  $^{84}\text{Kr}/^{83}\text{Kr}$  and  $^{132}\text{Xe}/^{131}\text{Xe}$ . Because of the high neutron capture cross-sections of  $^{83}\text{Kr}$  and  $^{131}\text{Xe}$ , these ratios are diagnostic of total neutron fluence experienced by the fuel and should therefore increase monotonically with fuel burnup and irradiation time (Cassata et al., 2023). However, measured ratios are much lower near the fuel pellet edge, indicating that fission gas in edge samples has experienced a shorter irradiation time than that in the pellet center. This is only possible if a significant fraction of gas produced early in the irradiation has been lost from edge samples.

200 Second, we compare observed to expected  $^{85}\text{Kr}$  ages. Because both  $^{85}\text{Kr}$  production and decay are taking place throughout the period of irradiation, an apparent  $^{85}\text{Kr}$  gas age is expected to date some time in the middle of the irradiation. In Figure 6 we calculate an expected age for each fuel from the known irradiation dates by making the simplifying assumptions that the Kr production rate is constant throughout the irradiation and all gas is retained. The results differ from this expectation in several ways. With the exception of the edge samples that are biased young by gas loss as  
205 discussed above, the ATM-109 particles have apparent ages older than expected. This is relatively easy to explain by the observation that Kr fission yields from  $^{239}\text{Pu}$  are 40-60% lower than from  $^{235}\text{U}$ . For this high-burnup fuel, the Kr production rate has therefore nearly certainly decreased over time as  $^{235}\text{U}$  is depleted and Kr production late in the irradiation becomes dominated by  $^{239}\text{Pu}$  fission. If the Kr production rate has decreased throughout the course of the irradiation and all gas is retained, the apparent  $^{85}\text{Kr}$  age is expected to be skewed old. This appears to be the case  
210 for particle samples from the center of the ATM-109 fuel pellet. Overall, for the ATM-109 particle data, offsets from the  $^{85}\text{Kr}$  age expected from simple assumptions are significant and spatially variable, but can be satisfactorily explained by decreasing Kr production during a long irradiation as well as gas loss during formation of high-burnup structure at the pellet edge.

On the other hand, apparent  $^{85}\text{Kr}$  dates for the BR3 fuel are younger than expected for constant production, and close  
215 to the end of the irradiation. This is unexpected for this 8%-enriched, moderate-burnup fuel, for which the assumption of constant production during the irradiation should be much closer to correct than for the 3%-enriched, high-burnup ATM-109 fuel. Model simulations of the BR3 fuel (Cassata et al., 2023, see also Fig. 2) predict that its apparent age at discharge should be within 0.05-0.1 yr of the age expected from simple assumptions. It is likely that some fission gas was lost from the fuel to the rod plenum during irradiation, and this gas was not captured in the analysis of these samples,  
220 so a young bias to the age due to gas loss is possible. However, typical losses of 10-15% are insufficient to explain the magnitude of the observed young bias in apparent ages. In addition, gas loss would be expected to be highest at the axial center of the rod where fuel temperatures are the highest, so if gas loss was a good explanation for the young bias, we would see younger apparent ages in the axial center of the rod. In fact, we see a slightly older (although indistinguishable at uncertainty) age from the axial center sample. Overall, although the apparent ages from the BR3 samples fall within  
225 the known period of irradiation, we do not have a satisfying explanation for why they are systematically 1-2 years younger than expected.

Third, we discuss the implications of age variations for grouping of samples. Although it is evident from the BR3 results that the apparent  $^{85}\text{Kr}$  age is position-independent at the bulk sample level, the ATM-109 microparticle results show that this is not strictly the case at the level of individual particles. All apparent ages from ATM-109 samples fall within the



230 period during which the fuel was irradiated, but variations in apparent age in excess of measurement uncertainty are  
evident both across the radial array of samples and in replicate data from the same radial position. Although the long  
irradiation and high burnup of the ATM-109 fuel likely give rise to more internal variability than would be expected for a  
fuel with a more typical history, strictly, these samples could not be associated with each other purely on the basis of the  
apparent  $^{85}\text{Kr}$  age alone. However, the apparent  $^{85}\text{Kr}$  age is not determined in isolation, but as part of a larger set of Xe  
235 and Kr isotope ratio measurements that provides additional leverage in grouping samples. It is clear from, for example,  
Figure 5, that even though the ATM-109 samples do not all have exactly the same  $^{85}\text{Kr}$  age, when multiple isotope ratios  
are considered they belong to a coherent array.

Finally, we highlight several aspects of uncertainty analysis. Given the assumption (discussed above) that the neutron  
spectrum is typical of a normal commercial power reactor, nominal measurement uncertainty in the apparent  $^{85}\text{Kr}$  age is  
240 dominated by measurement uncertainty on  $^{85}\text{Kr}$  and to a lesser extent on other Kr isotopes, especially for signal-limited  
measurements from small particles. These nominal uncertainties (Table 2) are 0.2-0.6 yr for non-signal-limited measure-  
ments from the BR3 dissolution gas and 0.5-3 yr for lower-abundance measurements on the ATM-109 microparticles. As  
noted above, an additional uncertainty on the initial  $^{85}\text{Kr}/(^{83}\text{Kr}+^{84}\text{Kr})$  ratio would arise if the reactor type and therefore  
the neutron spectrum responsible for fission were completely unknown. However, it is evident from Figure 6 that the most  
245 important uncertainty in interpreting apparent  $^{85}\text{Kr}$  ages arises not from measurement uncertainties but from systematic  
deviations between observed ages and those expected from simple assumptions. These are larger than measurement  
uncertainty and are related to irradiation history and duration, fuel enrichment and burnup, and, at least in the high-burnup  
ATM-109 samples, enhanced fission gas loss near fuel pellet edges. These complications could be important if, for exam-  
ple, seeking to use  $^{85}\text{Kr}$  age data to associate fuel samples with one of several candidate irradiation periods, or to infer  
250 the irradiation duration of fuel samples with a known discharge date. Overall, systematic variations in apparent  $^{85}\text{Kr}$  age  
that depend on irradiation conditions are a more important limit to the interpretability of these data than the measurement  
uncertainties.

## 5 $^{85}\text{Kr}$ compared to other spent fuel chronometers

Other radiochronometers have been proposed and/or used for spent fuel samples. Their relative applicability and useful-  
255 ness compared to  $^{85}\text{Kr}$  chronometry are likely to vary with fuel enrichment and burnup, type and amount of sample, and  
available measurement technology. However, here we highlight some general differences between  $^{85}\text{Kr}$  and two other  
proposed chronometers that have been applied to small particle samples of spent fuel:  $^{90}\text{Sr}$  (Savina et al., 2023) and  
 $^{241}\text{Pu}$  (Hanson and Pollington, 2021).

$^{90}\text{Sr}$  is a fission product with a half-life of 28.2 years that can be used as a chronometer by comparison with the stable  
260 fission product  $^{88}\text{Sr}$ . As for the ratio  $^{85}\text{Kr}/(^{83}\text{Kr}+^{84}\text{Kr})$ , the initial  $^{90}\text{Sr}/^{88}\text{Sr}$  ratio depends on the proportion of fissions  
derived from the various actinide isotopes and neutron energies. With  $^{85}\text{Kr}$ , we exploit variations in stable Kr and Xe  
isotopes that are produced simultaneously to infer the initial  $^{85}\text{Kr}/(^{83}\text{Kr}+^{84}\text{Kr})$  ratio, and model simulations show that the



initial ratio estimate has percent-level uncertainty. For  $^{90}\text{Sr}$ , the  $^{90}\text{Sr}/^{88}\text{Sr}$  ratio only varies at the percent level across the full range of fission sources, so can be estimated with comparable precision. Savina et al. (2023) used a resonance ionization mass spectrometer (RIMS) to measure  $^{90}\text{Sr}/^{88}\text{Sr}$  ages on 10-micron microparticles derived from a sample of the BR3 fuel, and obtained apparent ages very close to the age expected from constant production (1-2 years older than our apparent  $^{85}\text{Kr}$  ages for bulk samples of this fuel). Important differences between the  $^{85}\text{Kr}$  and  $^{90}\text{Sr}$  chronometers are as follows:

- $^{85}\text{Kr}$  has a lower fission yield than  $^{90}\text{Sr}$  and also can be lost by diffusion, so the  $^{90}\text{Sr}$  concentration in spent fuel is expected to be higher. Thus, measurement precision on  $^{90}\text{Sr}$  may be better for small samples.
- The production rate of both  $^{90}\text{Sr}$  and  $^{85}\text{Kr}$  is expected to be relatively constant throughout an irradiation in most cases. Thus, apparent ages for both should fall within the middle of an irradiation.
- Sr is expected to be far less diffusively mobile than Kr, which implies that variability in apparent ages at the microparticle scale that are caused by Kr mobility would not be evident in  $^{90}\text{Sr}$  ages.
- Measurement of Kr isotopes in fuel microparticles utilizes the relatively simple and widely used analytical method of heating under vacuum followed by noble gas mass spectrometry, whereas measurement of Sr isotopes requires either sample dissolution and chemical separation, which is complex and time-consuming, or the use of a RIMS system, which is not widely available.

$^{241}\text{Pu}$  is produced by neutron capture during irradiation and decays to  $^{241}\text{Am}$  with a half-life of 14.35 years. Thus, the  $^{241}\text{Am}/^{241}\text{Pu}$  ratio in spent fuel provides an age estimate for the fuel. This chronometer was, for example, applied to 10- to 20-micron size samples of the BR3 fuel by Hanson and Pollington (2021). By comparison with  $^{85}\text{Kr}$  chronometry,

- Due to neutron capture on  $^{241}\text{Am}$ , the  $^{241}\text{Am}/^{241}\text{Pu}$  ratio at discharge is lower than expected from  $^{241}\text{Pu}$  production alone, and varies with fluence. Thus, to achieve comparable precision to the  $^{85}\text{Kr}$  or  $^{90}\text{Sr}$  chronometers, it would most likely be necessary to apply an independent fluence signature to account for  $^{241}\text{Am}$  loss during irradiation.
- Production of  $^{241}\text{Pu}$  requires three successive neutron capture reactions, so is weighted toward the end of an irradiation. Thus, a  $^{241}\text{Pu}$  age is expected to date a later time in an irradiation than an  $^{85}\text{Kr}$  or  $^{90}\text{Sr}$  age.
- Measurement of the  $^{241}\text{Am}/^{241}\text{Pu}$  ratio requires sample dissolution and chemical separation of Am from Pu, followed by two separate isotope dilution measurements. Thus, it is much more complex and time-consuming than measurement of Kr isotope ratios by vacuum heating/NGMS or measurement of Sr isotope ratios by RIMS.
- Am and Pu are not expected to be diffusively mobile, so in principle  $^{241}\text{Am}/^{241}\text{Pu}$  ages should display less internal variability than  $^{85}\text{Kr}$  ages. However, in the one application of this method to small particle samples, Hanson and Pollington (2021) observed relatively high and apparently nonsystematic internal variability, well in excess of nominal measurement uncertainty.





## 6 Conclusions

295 The age since irradiation of spent reactor fuel can be computed by measuring the  $^{85}\text{Kr}/(^{83}\text{Kr}+^{84}\text{Kr})$  ratio of gas extracted from spent fuel samples, and using simultaneous measurements of other Kr and Xe isotope ratios to estimate the initial  $^{85}\text{Kr}/(^{83}\text{Kr}+^{84}\text{Kr})$  ratio at the time of fission gas production. This method has several possible advantages in relation to other radiochronometric methods, in particular that it only requires a single simultaneous measurement of Kr and Xe isotopes, which is relatively rapid and utilizes fairly simple and widely available vacuum heating and noble gas mass spectrometry systems. When applied to micron-scale particles of spent fuel, the method is nondestructive in that the samples are not melted or otherwise damaged and could be subjected to further chemical analysis, although it is possible that some other volatile elements besides the noble gases are depleted during heating.

$^{85}\text{Kr}$  chronometry applied to two sets of samples of spent reactor fuel yields apparent ages that fall entirely within known periods of irradiation. From this perspective, the method is successful. When considered in more detail, we observed both systematic (e.g., from edge to center of a fuel pellet) and random (e.g., variability among replicates) variation in apparent age among microparticle samples, as well as differences between measured  $^{85}\text{Kr}$  ages and expected ages near irradiation midpoints for both bulk and particulate samples. We attribute these observations to aspects of the fuel history (e.g., irradiation duration and burnup) as well as diffusive mobility of noble gases within uranium oxide fuel. In particular, understanding diffusive loss of fissionogenic Kr during irradiation is important in relating an apparent  $^{85}\text{Kr}$  age to the true dates of fuel irradiation.

From the perspective of using the  $^{85}\text{Kr}$  chronometer to group samples of unknown origin, indistinguishable  $^{85}\text{Kr}$  ages from bulk dissolutions of fuel slices at different axial positions show that the  $^{85}\text{Kr}$  age is a position-independent signature at the bulk sample level. On the other hand, observed variations in apparent  $^{85}\text{Kr}$  ages among particles from the same fuel sample show that this is not strictly the case at the microparticle scale. Especially for high-burnup fuel, internal variation in  $^{85}\text{Kr}$  ages at the particle scale is likely. However, both our observations and our explanation of observed internal variability indicate that the magnitude of internal variability (i) cannot exceed the duration of fuel irradiation, and (ii) is most likely maximized in high-burnup samples. Thus, for typical fuel irradiation durations of 1-2 years, internal variability in  $^{85}\text{Kr}$  ages on particle samples will likely not exceed measurement uncertainty, and therefore will not by itself preclude accurate grouping of samples. In addition, when both the  $^{85}\text{Kr}$  age and other simultaneously measured stable Kr and/or Xe isotope ratios are considered, data from particles of common origin will form coherent arrays. Even in the presence of some internal variability in  $^{85}\text{Kr}$  ages, sample grouping can be improved by considering the  $^{85}\text{Kr}$  age as part of a set of multiple noble gas isotope ratios.

*Data availability.* All data described in this paper are included in the tables and the supplement.



*Author contributions.* Conceptualization: GB, AJC, DDR, DB, BHI; Methodology: GB, AJC, DDR, DB; Software: GB, AJC; Validation: 325 GB, AJC; Formal analysis: GB, AJC, CDW; Investigation: GB, CDW; Resources: GB, AJC, CDW; Writing (original draft): GB, CDW; Writing (review and editing): all authors; Visualization: GB, DDR, DB; Project administration: GB, BHI; Funding acquisition: AJC, BHI.

*Competing interests.* Balco is a member of the Geochronology editorial board.

*Acknowledgements.* Work at LLNL was performed under the auspices of the U.S. Department of Energy under Contract DE-AC52-07NA27344; this is LLNL-JRNL-861096-DRAFT.



Table 1: Cumulative fission yields, cumulative fission yield ratios, and neutron capture cross-sections for relevant Kr isotopes. Data are from ENDF/B-VIII.

|                                                                 | $^{235}\text{U}_{\text{them}}$ | $^{235}\text{U}_{\text{fast}}$ | $^{238}\text{U}_{\text{fast}}$ | $^{239}\text{Pu}_{\text{them}}$ | $^{239}\text{Pu}_{\text{fast}}$ | Neutron capture x-section $s(n,g)$ (barns) |           |      |
|-----------------------------------------------------------------|--------------------------------|--------------------------------|--------------------------------|---------------------------------|---------------------------------|--------------------------------------------|-----------|------|
|                                                                 |                                |                                |                                |                                 |                                 | Thermal                                    | Resonance | Fast |
| Cumulative fission yields (%)                                   |                                |                                |                                |                                 |                                 |                                            |           |      |
| $^{82}\text{Se}$                                                |                                |                                |                                |                                 |                                 | <0.1                                       | 0.2       | <0.1 |
| $^{83}\text{Kr}$                                                | 0.536                          | 0.577                          | 0.396                          | 0.297                           | 0.315                           | 198                                        | 188       | <0.1 |
| $^{84}\text{Kr}$                                                | 1.002                          | 1.031                          | 0.826                          | 0.480                           | 0.453                           | 0.1                                        | 2.1       | <0.1 |
| $^{85}\text{Kr}$                                                | 0.283                          | 0.275                          | 0.149                          | 0.123                           | 0.110                           | 1.7                                        | 2.7       | <0.1 |
| $^{86}\text{Kr}$                                                | 1.965                          | 1.947                          | 1.296                          | 0.766                           | 0.787                           | <0.1                                       | <0.1      | <0.1 |
| Cumulative fission yield ratios                                 |                                |                                |                                |                                 |                                 |                                            |           |      |
| $^{85}\text{Kr}/^{86}\text{Kr}$                                 | 0.144                          | 0.141                          | 0.115                          | 0.160                           | 0.139                           |                                            |           |      |
| $^{85}\text{Kr}/(^{83}\text{Kr}+^{84}\text{Kr})$                | 0.184                          | 0.171                          | 0.122                          | 0.158                           | 0.143                           |                                            |           |      |
| $^{85}\text{Kr}/(^{83}\text{Kr}+^{84}\text{Kr}+^{86}\text{Kr})$ | 0.081                          | 0.077                          | 0.059                          | 0.080                           | 0.071                           |                                            |           |      |



**Table 2. Isotopic composition of Xe and Kr in spent fuel samples.**

| Sample name                                                    | Relative Kr abundances (Kr-86 = 100)       |       |       | Relative Xe abundances (Xe-134 = 100) |        |         | +/-   |
|----------------------------------------------------------------|--------------------------------------------|-------|-------|---------------------------------------|--------|---------|-------|
|                                                                | Kr-83                                      | Kr-84 | Kr-85 | Xe-131                                | Xe-132 | Xe-136  |       |
| ATM-109 microparticle samples                                  |                                            |       |       |                                       |        |         |       |
|                                                                | Radial distance from pellet edge (microns) |       |       |                                       |        |         |       |
| ATM-109-20-54                                                  | 26.8                                       | 1.3   | 1.694 | 35.87                                 | 76.95  | 157.05  | 0.61  |
| ATM-109-20-55                                                  | 27.7                                       | 2.9   | 1.656 | 35.20                                 | 77.81  | 156.76  | 0.81  |
| ATM-109-60-54                                                  | 21.0                                       | 1.2   | 1.408 | 31.02                                 | 80.57  | 156.99  | 0.56  |
| ATM-109-60-55                                                  | 19.8                                       | 1.4   | 1.264 | 29.62                                 | 81.65  | 156.13  | 0.64  |
| ATM-109-120-01                                                 | 17.6                                       | 1.0   | 1.189 | 25.69                                 | 83.54  | 155.55  | 0.81  |
| ATM-109-120-02                                                 | 18.93                                      | 0.55  | 1.107 | 25.63                                 | 83.38  | 154.96  | 0.88  |
| ATM-109-400-01                                                 | 17.07                                      | 70.1  | 2.0   | 21.83                                 | 84.47  | 152.95  | 0.80  |
| ATM-109-400-02                                                 | 17.33                                      | 0.29  | 1.004 | 22.71                                 | 83.74  | 152.56  | 0.86  |
| ATM-109-800-01                                                 | 15.02                                      | 0.20  | 1.102 | 20.100                                | 84.38  | 151.13  | 0.67  |
| ATM-109-800-02                                                 | 17.32                                      | 0.27  | 1.103 | 21.55                                 | 83.59  | 151.91  | 0.99  |
| ATM-109-1600-01                                                | 16.78                                      | 0.40  | 1.240 | 21.75                                 | 83.09  | 152.01  | 0.81  |
| ATM-109-1600-02                                                | 15.42                                      | 0.21  | 1.083 | 20.59                                 | 83.32  | 151.73  | 0.94  |
| ATM-109-3200-01                                                | 15.65                                      | 0.52  | 1.132 | 21.77                                 | 81.80  | 151.67  | 0.80  |
| ATM-109_3-1                                                    | 15.38                                      | 0.26  | 1.195 | 21.321                                | 81.65  | 151.30  | 0.43  |
| ATM-109_3-2                                                    | 15.50                                      | 0.38  | 1.428 | 21.344                                | 81.74  | 151.25  | 0.65  |
| ATM-109_3-3                                                    | 16.34                                      | 0.37  | 1.083 | 21.686                                | 81.21  | 151.58  | 0.53  |
| BR-3 total dissolutions (reproduced from Cassata et al., 2023) |                                            |       |       |                                       |        |         |       |
|                                                                | Axial distance from rod bottom (cm)        |       |       |                                       |        |         |       |
| G14                                                            | 25.98                                      | 0.39  | 1.023 | 34.359                                | 58.799 | 115.492 | 0.082 |
| G16                                                            | 25.62                                      | 0.31  | 1.026 | 34.84                                 | 60.50  | 118.33  | 0.31  |
| G18                                                            | 23.32                                      | 0.16  | 1.001 | 29.774                                | 64.64  | 138.95  | 0.23  |
| G21                                                            | 24.36                                      | 0.11  | 1.057 | 30.378                                | 62.486 | 134.88  | 0.26  |

Notes:

Relative abundances shown for ATM-109 particles reflect the sum of gas released in all heating steps after the initial preheat.



**Table 3.** <sup>86</sup>Kr age calculations.

| Sample name                   | Analysis date | Measured <sup>86</sup> Kr/( <sup>81</sup> K+ <sup>84</sup> K) | Measured <sup>136</sup> Xe/( <sup>131</sup> Xe+ <sup>136</sup> Xe) | Measured <sup>86</sup> Kr/( <sup>81</sup> K+ <sup>84</sup> K) +/- | Measured <sup>136</sup> Xe/( <sup>131</sup> Xe+ <sup>136</sup> Xe) +/- | Estimated initial <sup>86</sup> Kr/( <sup>81</sup> K+ <sup>84</sup> K) +/- | <sup>86</sup> Kr age (yr before analysis) +/- (yr) | <sup>86</sup> Kr age (calendar date) +/- (days) |
|-------------------------------|---------------|---------------------------------------------------------------|--------------------------------------------------------------------|-------------------------------------------------------------------|------------------------------------------------------------------------|----------------------------------------------------------------------------|----------------------------------------------------|-------------------------------------------------|
| ATM-109 microparticle samples |               |                                                               |                                                                    |                                                                   |                                                                        |                                                                            |                                                    |                                                 |
| ATM-109-20-54                 | 4/19/23       | 0.0184                                                        | 0.8864                                                             | 0.0021                                                            | 0.8864                                                                 | 0.1644                                                                     | 0.0017                                             | 5/27/89                                         |
| ATM-109-20-55                 | 4/19/23       | 0.0178                                                        | 0.8848                                                             | 0.0038                                                            | 0.8848                                                                 | 0.1642                                                                     | 0.0018                                             | 11/10/88                                        |
| ATM-109-60-54                 | 4/19/23       | 0.0158                                                        | 0.8962                                                             | 0.0019                                                            | 0.8962                                                                 | 0.1656                                                                     | 0.0017                                             | 11/10/86                                        |
| ATM-109-60-55                 | 4/19/23       | 0.0144                                                        | 0.8987                                                             | 0.0022                                                            | 0.8987                                                                 | 0.1659                                                                     | 0.0017                                             | 6/24/85                                         |
| ATM-109-120-01                | 8/10/23       | 0.0145                                                        | 0.9165                                                             | 0.0010                                                            | 0.9165                                                                 | 0.1676                                                                     | 0.0017                                             | 8/26/85                                         |
| ATM-109-120-02                | 8/11/23       | 0.0199                                                        | 0.9173                                                             | 0.0060                                                            | 0.9173                                                                 | 0.1678                                                                     | 0.0017                                             | 9/25/82                                         |
| ATM-109-400-01                | 8/12/23       | 0.01214                                                       | 0.9407                                                             | 0.0055                                                            | 0.9407                                                                 | 0.1697                                                                     | 0.0017                                             | 9/28/82                                         |
| ATM-109-400-02                | 8/13/23       | 0.01110                                                       | 0.9384                                                             | 0.0048                                                            | 0.9384                                                                 | 0.1696                                                                     | 0.0017                                             | 5/13/81                                         |
| ATM-109-800-01                | 8/14/23       | 0.01281                                                       | 0.9571                                                             | 0.0048                                                            | 0.9571                                                                 | 0.1709                                                                     | 0.0017                                             | 6/23/83                                         |
| ATM-109-800-02                | 8/15/23       | 0.01206                                                       | 0.9511                                                             | 0.0039                                                            | 0.9511                                                                 | 0.1705                                                                     | 0.0017                                             | 8/3/82                                          |
| ATM-109-1600-01               | 8/16/23       | 0.01407                                                       | 0.9539                                                             | 0.0062                                                            | 0.9539                                                                 | 0.1707                                                                     | 0.0017                                             | 12/13/84                                        |
| ATM-109-1600-02               | 8/17/23       | 0.01240                                                       | 0.9624                                                             | 0.0035                                                            | 0.9624                                                                 | 0.1712                                                                     | 0.0017                                             | 12/12/82                                        |
| ATM-109-3200-01               | 8/18/23       | 0.01358                                                       | 0.9656                                                             | 0.0060                                                            | 0.9656                                                                 | 0.1714                                                                     | 0.0017                                             | 5/3/84                                          |
| ATM-109_3-1                   | 11/6/21       | 0.01462                                                       | 0.9711                                                             | 0.0069                                                            | 0.9711                                                                 | 0.1718                                                                     | 0.0017                                             | 9/2/83                                          |
| ATM-109_3-2                   | 12/22/21      | 0.01763                                                       | 0.9701                                                             | 0.0090                                                            | 0.9701                                                                 | 0.1717                                                                     | 0.0017                                             | 9/16/86                                         |
| ATM-109_3-3                   | 1/21/22       | 0.01303                                                       | 0.9718                                                             | 0.0046                                                            | 0.9718                                                                 | 0.1718                                                                     | 0.0017                                             | 2/4/81                                          |
| BFS total dissolutions        |               |                                                               |                                                                    |                                                                   |                                                                        |                                                                            |                                                    |                                                 |
| G14                           | 8/12/20       | 0.01306                                                       | 1.07343                                                            | 0.0022                                                            | 1.07343                                                                | 0.1774                                                                     | 0.0018                                             | 3/11/80                                         |
| G16                           | 7/27/20       | 0.01299                                                       | 1.0489                                                             | 0.0053                                                            | 1.0489                                                                 | 0.1759                                                                     | 0.0018                                             | 3/12/80                                         |
| G18                           | 8/4/20        | 0.01260                                                       | 1.0591                                                             | 0.0022                                                            | 1.0591                                                                 | 0.1765                                                                     | 0.0018                                             | 9/10/79                                         |
| G21                           | 8/6/20        | 0.01335                                                       | 1.0768                                                             | 0.0014                                                            | 1.0768                                                                 | 0.1777                                                                     | 0.0018                                             | 7/1/80                                          |

Notes:

Only initial <sup>86</sup>Kr/(<sup>81</sup>K+<sup>84</sup>K) ratios and ages calculated from stable Xe isotope ratios are shown. Corresponding calculations based on stable Kr isotopes are not included.



## References

- Buck, E. C., Mausolf, E. J., McNamara, B. K., Soderquist, C. Z., and Schwantes, J. M.: Nanostructure of metallic particles in light water  
335 reactor used nuclear fuel, *Journal of Nuclear Materials*, 461, 236–243, 2015.
- Cassata, W. S., Isselhardt, B. H., Conant, A. J., Charboneau, J., and Carney, K. P.: Noble gas constraints on spent fuel irradiation  
histories, *Journal of Radioanalytical and Nuclear Chemistry*, 332, 3151–3159, 2023.
- Clark, R. A., Conroy, M. A., Lach, T. G., Buck, E. C., Pellegrini, K. L., McNamara, B. K., and Schwantes, J. M.: Distribution of metallic  
fission-product particles in the cladding liner of spent nuclear fuel, *npj Materials Degradation*, 4, 4, 2020.
- 340 Dayman, K. J. and Weber, C. F.: Flexible classification with spatial quantile comparison and novel statistical features applied to spent  
nuclear fuel analysis, *Journal of Radioanalytical and Nuclear Chemistry*, 318, 605–618, 2018.
- Dayman, K. J., Weber, C. F., Luciano, N. P., Ade, B. J., Francis, M. W., Nicholson, A. D., Worrall, L. G., Stewart, S., Adams, M. B.,  
and Drescher, A.: Transformative Data Analytics Capabilities for Nuclear Forensics and Safeguards, Tech. rep., Oak Ridge National  
Lab.(ORNL), Oak Ridge, TN (United States), 2019.
- 345 Hanson, S. K. and Pollington, A. D.: Measuring signatures of fuel irradiation in large particle samples, *Journal of Analytical Atomic  
Spectrometry*, 36, 1018–1027, 2021.
- Hudson, G. B.: Noble gas isotope measurements for spent nuclear fuel reprocessing. IAEA Task 90/0A211 interim report, Tech. rep.,  
Lawrence Livermore National Lab.(LLNL), Livermore, CA (United States), 1993.
- Kristo, M. J., Gaffney, A. M., Marks, N., Knight, K., Cassata, W. S., and Hutcheon, I. D.: Nuclear forensic science: analysis of nuclear  
350 material out of regulatory control, *Annual review of earth and planetary sciences*, 44, 555–579, 2016.
- Okano, M., Kuno, T., Shirouzu, H., Yamada, K., Sakai, T., Takahashi, I., Charlton, W. S., Wells, C. A., and Hemberger, P. H.: Eval-  
uation technology for burnup and generated amount of plutonium by measurement of Xenon isotopic ratio in dissolver off-gas at  
reprocessing facility (Joint research), Tech. Rep. JAEA-Technology 2006-055, Japan Atomic Energy Agency, 2006.
- Park, S., Min, D., Ha, Y., and Song, K.: The measurement of compositions and the isotopic distribution of released fission gas in the  
355 fuel rods of pressurized water reactors (PWR) of Korea, *Journal of radioanalytical and nuclear chemistry*, 284, 287–295, 2010.
- Pellegrini, K. L., Soderquist, C. Z., Shen, S. D., Krogstad, E. J., Palmer, C. J., Gerez, K. R., Buck, E. C., Lach, T. G., Schwantes, J. M.,  
and Clark, R. A.: Chemical and isotopic characterization of noble metal phase from commercial UO<sub>2</sub> fuel, *Analytical chemistry*, 91,  
6522–6529, 2019.
- Reilly, D. D., Beck, C. L., Buck, E. C., Cliff, J. B., Duffin, A. M., Lach, T. G., Liezers, M., Springer, K. W., Tedrow, S. J., and Zimmer,  
360 M. M.: Focused ion beam for improved spatially-resolved mass spectrometry and analysis of radioactive materials for uranium  
isotopic analysis, *Talanta*, 211, 120 720, 2020.
- Rest, J., Cooper, M. W., Spino, J., Turnbull, J., Van Uffelen, P., and Walker, C. T.: Fission gas release from UO<sub>2</sub> nuclear fuel: A review,  
*Journal of Nuclear Materials*, 513, 310–345, 2019.
- Robel, M., Isselhardt, B., Ramon, E., Hayes, A., Gaffney, A., Borg, L., Lindvall, R., Erickson, A., Carney, K., Battisti, T., et al.: A  
365 composite position independent monitor of reactor fuel irradiation using Pu, Cs, and Ba isotope ratios, *Journal of environmental  
radioactivity*, 195, 9–19, 2018.
- Rondinella, V. V. and Wiss, T.: The high burn-up structure in nuclear fuel, *Materials today*, 13, 24–32, 2010.
- Savina, M. R., Isselhardt, B. H., and Trappitsch, R.: Simultaneous isotopic analysis of U, Pu, and Am in spent nuclear fuel by resonance  
ionization mass spectrometry, *Analytical Chemistry*, 93, 9505–9512, 2021.



- 370 Savina, M. R., Isselhardt, B. H., Shulaker, D. Z., Robel, M., Conant, A. J., and Ade, B. J.: Simultaneous isotopic analysis of fission product Sr, Mo, and Ru in spent nuclear fuel particles by resonance ionization mass spectrometry, *Scientific Reports*, 13, 5193, 2023.
- Walker, C., Brémier, S., Pöml, P., Papaioannou, D., and Bottomley, P.: Microbeam analysis of irradiated nuclear fuel, in: *IOP Conference Series: Materials Science and Engineering*, vol. 32, p. 012028, IOP Publishing, 2012.
- 375 Wolf, S., Bowers, D., and Cunnane, J.: Analysis of high burnup spent nuclear fuel by ICP-MS, *Journal of radioanalytical and Nuclear Chemistry*, 263, 581–586, 2005.
